# Supplementary material for: Conjugated Organic Photothermal Films for Spatiotemporal Thermal Engineering
Source: PubMed Central journal article supplement — Adv Mater. 2021 May 29;33(47):2005940. doi: 10.1002/adma.202005940 (PMC11468520; doi:10.1002/adma.202005940), 2021-05-29
Supplement: ADMA-33-2005940-s001.pdf [file ADMA-33-2005940-s001.pdf]

# ADVANCED MATERIALS

## Supporting Information

for *Adv. Mater.*, DOI: 10.1002/adma.202005940

Conjugated Organic Photothermal Films for  
Spatiotemporal Thermal Engineering

*Hee Jung Kim, Byeongwan Kim, Yanghyun Auh, and  
Eunyoung Kim\**

## Supporting Information

# Conjugated Organic Photothermal Films for Spatiotemporal Thermal Engineering

Hee Jung Kim<sup>†</sup>, Byeongwan Kim<sup>†</sup>, Yangyun Auh, and Eunkyong Kim\*

Department of Chemical and Biomolecular Engineering, Yonsei University, 50 Yonsei-ro, SODAEMUN-GU, Seoul 03722, South Korea

[<sup>†</sup>] These authors contributed equally to this work

E-mail: \*Prof. E. Kim, eunkim@yonsei.kr

Keywords: conjugated polymers, photothermal properties, synthesis, photoacutination, energy harvesting, water evaporation

**Table S1.** Symbols list (alphabetical order)

| Symbol           | Full name                              |
|------------------|----------------------------------------|
| $a$              | surface area                           |
| $\nabla T$       | temperature gradient                   |
| $C_p$            | heat capacity                          |
| $C_p$            | specific heat capacity                 |
| $d_{\text{HCS}}$ | diameter of harvested cell sheet       |
| $d_{\text{NIR}}$ | diameter of NIR- exposed area          |
| $E_F$            | Fermi level                            |
| $f(E)$           | the Fermi–Dirac distribution function  |
| $g_V(E)$         | density of state                       |
| $H$              | enthalpy of liquid- vapor phase change |
| $h$              | heat-transfer coefficient              |

---

|                 |                                                        |
|-----------------|--------------------------------------------------------|
| $H_e$           | heat of evaporation of the water                       |
| $I$             | output current                                         |
| $I_{pd}$        | (light) power density                                  |
| $l$             | thickness                                              |
| $m$             | mass                                                   |
| $m_w$           | mass of evaporated water                               |
| $p$             | carrier concentration                                  |
| $P$             | output power                                           |
| $p_0$           | initial pressure rise                                  |
| $PF_{PTE}$      | PTE power factor                                       |
| $Q_{cond}$      | heat conduction                                        |
| $Q_{conv}$      | heat convection                                        |
| $Q_e$           | power density for evaporation of water                 |
| $Q_i$           | incident light power density                           |
| $Q_{PT}$        | heat for a photothermal effect                         |
| $Q_{rad}$       | heat radiation                                         |
| $Q_{surr}$      | heat loss to the surrounding environment               |
| $R$             | resistance between the two electrodes                  |
| $S_{PTE}$       | photothermoelectric Seebeck coefficient                |
| $S_{TE}$        | thermoelectric Seebeck coefficient                     |
| $T$             | temperature                                            |
| $T_{max}$       | maximum temperature                                    |
| $T_{surr}$      | surrounding temperature of system                      |
| $V$             | output voltage                                         |
| $\beta$         | isobaric volume expansion coefficient                  |
| $\Gamma$        | Grüneisen parameter                                    |
| $\Delta T$      | temperature difference                                 |
| $\Delta T_{PT}$ | temperature increase by photothermal effect            |
| $\Delta v$      | difference in evaporation rates with and without light |
| $\varepsilon$   | absorption coefficient                                 |
| $\eta_d$        | efficiency of cell detachment                          |
| $\eta_{PT}$     | photothermal conversion efficiency                     |
| $\eta_{PTE}$    | photothermoelectric efficiency                         |
| $\eta_{PTW}$    | photothermal efficiency of water vaporization          |
| $\eta_{STE}$    | solar thermal efficiency                               |
| $\eta_w$        | water evaporation efficiency                           |
| $\theta$        | dimensionless temperature ratio                        |
| $\theta_b$      | bending angle                                          |
| $\kappa$        | isothermal compressibility                             |
| $\lambda_{abs}$ | maximum absorption wavelength                          |
| $\lambda_{PT}$  | light wavelength for PT engineering                    |
| $\mu$           | carrier (Hall) mobility                                |
| $\mu_a$         | absorption coefficient of tissue                       |
| $\rho$          | mass density                                           |
| $\sigma_e$      | electrical conductivity                                |
| $\tau_s$        | time constant                                          |

---

**Table S2.** Abbreviations list (alphabetical order)

| Abbreviation | Full name                                                                                                                                            |
|--------------|------------------------------------------------------------------------------------------------------------------------------------------------------|
| A            | acceptor                                                                                                                                             |
| ADSC         | adipose- derived stem cell                                                                                                                           |
| AM           | antimicrobial                                                                                                                                        |
| APTES        | (3-aminopropyl)triethoxysilane                                                                                                                       |
| AVT          | average visible transmittance                                                                                                                        |
| f-BNNS       | functionalized boron nitrogen nanosheet                                                                                                              |
| BSM          | black sesame melanin                                                                                                                                 |
| BT           | benzothiadiazole                                                                                                                                     |
| CP           | conjugated polymer                                                                                                                                   |
| CPM          | constant potential method                                                                                                                            |
| Croc         | croconaine                                                                                                                                           |
| Croc-c       | 2,5-bis[(4-carboxylic-piperidylamino)thiophenyl]-croconium                                                                                           |
| CS           | cell sheet                                                                                                                                           |
| CTE          | coefficient of thermal expansion                                                                                                                     |
| CTGS         | carbonized towel- gourd sponges                                                                                                                      |
| CV           | cyclic voltammogram                                                                                                                                  |
| CVD          | chemical vapor deposition                                                                                                                            |
| Cy           | cyanine                                                                                                                                              |
| D            | donor                                                                                                                                                |
| DCB          | 1,2-dichlorobenzene                                                                                                                                  |
| DCM          | dichloromethane                                                                                                                                      |
| DI           | diimmonium salt                                                                                                                                      |
| DMF          | dimethylformamide                                                                                                                                    |
| DOS          | density of state                                                                                                                                     |
| DOX          | doxorubicin hydrochloride                                                                                                                            |
| DPP          | diketopyrrolopyrrole                                                                                                                                 |
| DPPT         | poly{2,2'-[(2,5-bis(2-hexyldecyl)-3,6-dioxo-2,3,5,6-tetrahydropyrrolo[3,4-c]pyrrole-1,4-diyl)dithiophene]-5,5'-diyl- <i>alt</i> -thiophene-2,5-diyl} |
| DPPV         | poly{2,2'-[(2,5-bis(2-hexyldecyl)-3,6-dioxo-2,3,5,6-tetrahydropyrrolo[3,4-c]pyrrole-1,4-diyl)dithiophene]-5,5'-diyl- <i>alt</i> -vinyle              |
| DSPE-PEG2000 | 1,2-distearoyl- <i>sn</i> -glycero-3-phosphoethanolamine- <i>N</i> -[methoxy(polyethylene glycerol)-2000]                                            |
| DSSC         | dye-sensitized solar cell                                                                                                                            |
| DT           | 2,2'-bithiophene                                                                                                                                     |
| DTP          | 4H-dithieno[3,2- <i>b</i> :2',3'- <i>d</i> ]pyrrole                                                                                                  |
| EB           | emeraldine base                                                                                                                                      |
| EDOT         | 3,4-ethylenedioxythiophene                                                                                                                           |
| ES           | emeraldine salt                                                                                                                                      |
| EXIM         | excited-state intramolecular motion                                                                                                                  |

---

|              |                                                                                                                                                                                                               |
|--------------|---------------------------------------------------------------------------------------------------------------------------------------------------------------------------------------------------------------|
| FDA          | the U.S. Food and Drug Administration                                                                                                                                                                         |
| FESEM        | field emission scanning electron microscopy                                                                                                                                                                   |
| FL           | fluorescence                                                                                                                                                                                                  |
| FLI          | fluorescence imaging                                                                                                                                                                                          |
| GO           | graphene oxide                                                                                                                                                                                                |
| ICG          | indocyanine green                                                                                                                                                                                             |
| ICT          | intramolecular charge transfer                                                                                                                                                                                |
| IDI          | isobutyl-substituted diimmonium borate                                                                                                                                                                        |
| IPA          | <i>N,N,N',N'</i> - tetrakis[4- (diisobutylamino)phenyl]- 1,4-phenylenediamine                                                                                                                                 |
| IR-780       | 2-[2-[2-chloro-3-[(1,3-dihydro-3,3-dimethyl-1-propyl-2H-indol-2-ylidene)ethylidene]-1-cyclohexen-1-yl]ethenyl]-3,3-dimethyl-1-propylindolium iodide                                                           |
| IR-820       | 2-[2-[2-chloro-3-[[1,3-dihydro-1,1-dimethyl-3-(4-sulfobutyl)-2H-benzo[e]indol-2-ylidene]-ethylidene]-1-cyclohexen-1-yl]-ethenyl]-1,1-dimethyl-3-(4-sulfobutyl)-1H-benzo[e]indolium hydroxide inner salt       |
| IR-825       | 3-(4-carboxybenzyl)-2-((E)-2-((E)-3-((Z)-2-(3-(4-carboxybenzyl)-1,1-dimethyl-1,3-dihydro-2H-benzo[e]indol-2-ylidene)ethylidene)-2-chlorocyclohex-1-en-1-yl)vinyl)-1,1-dimethyl-1H-benzo[e]indol-3-ium bromide |
| ISC          | intersystem crossing                                                                                                                                                                                          |
| ITO          | indium tin oxide                                                                                                                                                                                              |
| LC           | liquid crystal                                                                                                                                                                                                |
| LED          | light emitting diode                                                                                                                                                                                          |
| mol-PT       | molecular photothermal                                                                                                                                                                                        |
| Molecule (1) | 1,1,2-trimethyl-1H-benzo[e]indole                                                                                                                                                                             |
| Molecule (2) | 4-(1,1,2-trimethyl-1H-benzo[e]indolium-3-yl)butane-1-sulfonate                                                                                                                                                |
| Molecule (3) | <i>N</i> -phenyl- <i>N</i> -((1 <i>E</i> ,3 <i>E</i> ,5 <i>E</i> )-5-(phenylimino)penta-1,3-dienyl)acetamide triethyl amine                                                                                   |
| Monomer (4)  | 3,6-bis(5-bromothiophene-2-yl)-2,5-bis(2-hexyldecyl)pyrrolo[3,4- <i>c</i> ]pyrrole-1,4-(2 <i>H</i> ,5 <i>H</i> )-dione                                                                                        |
| Monomer (5)  | <i>trans</i> -1,2-bis(tributylstannyl)ethene                                                                                                                                                                  |
| Monomer (6)  | dibromo-thiophene-fused benzodifurandione-based oligo( <i>p</i> -phenylenevinylene)                                                                                                                           |
| Monomer (7)  | 2-(trimethylstannyl)-5-(5-(trimethylstannyl)thiophen-2-yl)thiophene                                                                                                                                           |
| Monomer (8)  | terephthalonitrile                                                                                                                                                                                            |
| Monomer (9)  | 2,5-diaminobenzene-1,4-dithiol                                                                                                                                                                                |
| MW           | microwave                                                                                                                                                                                                     |
| MXene        | Ti <sub>3</sub> C <sub>2</sub> T <sub>x</sub> , where T is a functional group (e.g. O, F, OH, Cl)                                                                                                             |
| NIR          | near infrared                                                                                                                                                                                                 |
| NP           | nanoparticle                                                                                                                                                                                                  |
| NRD          | nonradiative decay                                                                                                                                                                                            |
| P3HT         | poly(3-hexylthiophene)                                                                                                                                                                                        |
| PANI         | polyaniline                                                                                                                                                                                                   |

---

---

|                                |                                                                                                                                                                                             |
|--------------------------------|---------------------------------------------------------------------------------------------------------------------------------------------------------------------------------------------|
| PA                             | photoacoustic                                                                                                                                                                               |
| PAI                            | photoacoustic imaging                                                                                                                                                                       |
| PAT                            | photoacoustic therapy                                                                                                                                                                       |
| PATo                           | photoacoustic tomography                                                                                                                                                                    |
| PCE                            | photothermal conversion efficiency                                                                                                                                                          |
| PCL                            | polycaprolactone                                                                                                                                                                            |
| PCPDTBSe                       | poly[4,4-bis(2-ethylhexyl)-cyclopenta[2,1-b;3,4-b']dithiophene-2,6-diyl- <i>alt</i> -2,1,3-benzoselenadiazole-4,7-diyl]                                                                     |
| PCPDTBT                        | poly[2,6-(4,4-bis-(2-ethylhexyl)-4H-cyclopenta[2,1-b;3,4-b']dithiophene)- <i>alt</i> -4,7(2,1,3-benzothiadiazole)]                                                                          |
| PDA                            | polydopamine                                                                                                                                                                                |
| PDMS                           | poly(dimethylsiloxane)                                                                                                                                                                      |
| PDPPTDQ                        | poly{2,2'-[(2,5-bis(2-ethylhexyl)-3,6-dioxo-2,3,5,6-tetrahydropyrrolo[3,4-c]pyrrole-1,4-diyl)dithiophene]-5,5'-diyl- <i>alt</i> -[6,7(4-hexylphenyl)-[1,2,5]thiadiazolo[3,4-g]quinoxaline]} |
| PDPPTTh                        | poly[diketopyrrolopyrrole- <i>alt</i> -thiophene]                                                                                                                                           |
| PDPTBT                         | poly(7-pentadecane-4H-dithieno[3,2-b:2',3'-d]pyrrole- <i>alt</i> -2,1,3-benzothiadiazole)                                                                                                   |
| PDPTDPP                        | poly[7-pentadecane-4H-dithieno[3,2-b:2',3'-d]pyrrole- <i>alt</i> -2,5-bis(2-octylododecyl)-3,6-di(thiophen-2-yl)pyrrolo[3,4-c]pyrrole-1,4(2H,5H)-dione]                                     |
| PDPTPT                         | poly(7-pentadecane-4H-dithieno[3,2-b:2',3'-d]pyrrole- <i>alt</i> -1,2,5-thiadiazolo[3,4-c]pyridine)                                                                                         |
| PDT                            | photodynamic therapy                                                                                                                                                                        |
| PE                             | piezoelectric                                                                                                                                                                               |
| PEDOS                          | poly(3,4-ethylenedioxy-selenophene)                                                                                                                                                         |
| PEDOS-C6                       | hexyl-derivatized poly(3,4-ethylenedioxy-selenophene)                                                                                                                                       |
| PEDOT                          | poly(3,4-ethylenedioxythiophene)                                                                                                                                                            |
| PEDOT-S                        | propane-1-sulfonated poly(3,4-ethylenedioxythiophene)                                                                                                                                       |
| PEDOT:PSS                      | polystyrene sulfonate doped poly(3,4-ethylenedioxythiophene)                                                                                                                                |
| PEPG                           | poly(ethylene glycol)- <i>block</i> -poly(propylene glycol)- <i>block</i> -poly(ethylene glycol)                                                                                            |
| PES                            | polyethersulfone                                                                                                                                                                            |
| PET                            | polyethylene terephthalate                                                                                                                                                                  |
| PETo                           | positron emission tomography                                                                                                                                                                |
| PF                             | NIR-blocking plastic filter                                                                                                                                                                 |
| PFBT                           | poly(9,9-dihexylfluorene- <i>alt</i> -2,1,3-benzothiadiazole)                                                                                                                               |
| PFTTQ                          | poly[9,9-bis(4-(2-ethylhexyl)phenyl)-fluorene- <i>alt-co</i> -6,7-bis(4-(hexyloxy)phenyl)-4,9-di-(thiophen-2-yl)thiadiazoloquinoxaline]                                                     |
| PM                             | photo-mechanical                                                                                                                                                                            |
| PMMA                           | poly(methyl methacrylate)                                                                                                                                                                   |
| PNIPAM                         | poly(N-isopropylacrylamide)                                                                                                                                                                 |
| pol-PT                         | polymeric photothermal                                                                                                                                                                      |
| Poly[Cu <sub>x</sub> (Cu-ett)] | poly[Cu <sub>x</sub> (Cu-ethylenetetrathiolate)]                                                                                                                                            |

---

---

|                          |                                                                                                                 |          |
|--------------------------|-----------------------------------------------------------------------------------------------------------------|----------|
| Poly(EDOT-HQ-co-EDOT-PC) | hydroquinone and phosphorylcholine functionalized PEDOT copolymer                                               |          |
| PorCP                    | porphyrin-based conjugated polymer                                                                              |          |
| PorCP2                   | poly([(5,15- diethynyl- 10,20- bis(3,5- bis(octyloxy)phenyl) porphyrinato]zinc- alt- (2,1,3- benzothiadiazole)) |          |
| PPBBT                    | poly(2-phenyl-benzobisthiazole)                                                                                 |          |
| PProDOS                  | poly(3,4-propylenedioxy-selenophene)                                                                            |          |
| PPy                      | polypyrrole                                                                                                     |          |
| PS                       | polystyrene                                                                                                     |          |
| PT                       | photothermal                                                                                                    |          |
| PTA                      | photothermal actuator                                                                                           |          |
| PTCS                     | photothermal cell sheet harvesting                                                                              |          |
| PTE                      | photothermoelectric                                                                                             |          |
| PTH                      | photothermal heater                                                                                             |          |
| PTHC                     | photothermal harvesting of cells                                                                                |          |
| PTII                     | poly(thienoisindigo)                                                                                            |          |
| PTSC                     | photothermal single cell harvesting                                                                             |          |
| PTT                      | photothermal therapy                                                                                            |          |
| PTW                      | photothermal water evaporation                                                                                  |          |
| PU                       | polyurethane                                                                                                    |          |
| PV                       | photovoltaic                                                                                                    |          |
| PVA                      | polyvinyl alcohol                                                                                               |          |
| PVDF                     | poly(vinylidene fluoride)                                                                                       |          |
| PVDF-TrFE                | poly(vinylidene fluoride- <i>co</i> -trifluoroethylene)                                                         |          |
| PVPS                     | poly(vinylpyrrolidone) sulfobetaine                                                                             |          |
| RGO                      | reduced graphene oxide                                                                                          |          |
| ROS                      | releases singlet oxygen                                                                                         |          |
| SC                       | single cell                                                                                                     |          |
| SCP                      | solution casting polymerization                                                                                 |          |
| SE                       | Stirling engine                                                                                                 |          |
| SEM                      | scanning electron microscopy                                                                                    |          |
| SPR                      | surface plasmon resonance                                                                                       |          |
| SS                       | stainless steel                                                                                                 |          |
| STE                      | solar thermal efficiency                                                                                        |          |
| TBDOPV                   | thiophene-fused benzodifurandione-based phenylenevinylene)                                                      | oligo(p- |
| TBDOPV-DT                | thiophene-fused benzodifurandione-based phenylenevinylene)-2,2'-bithiophene                                     | oligo(p- |
| TE                       | thermoelectric                                                                                                  |          |
| Tos                      | tosylate                                                                                                        |          |
| TzQI-TDPP                | poly(thiadiazoloquinoxalinimide-thiophene-flanked diketopyrrolopyrrole)                                         |          |
| UV                       | ultraviolet                                                                                                     |          |

---

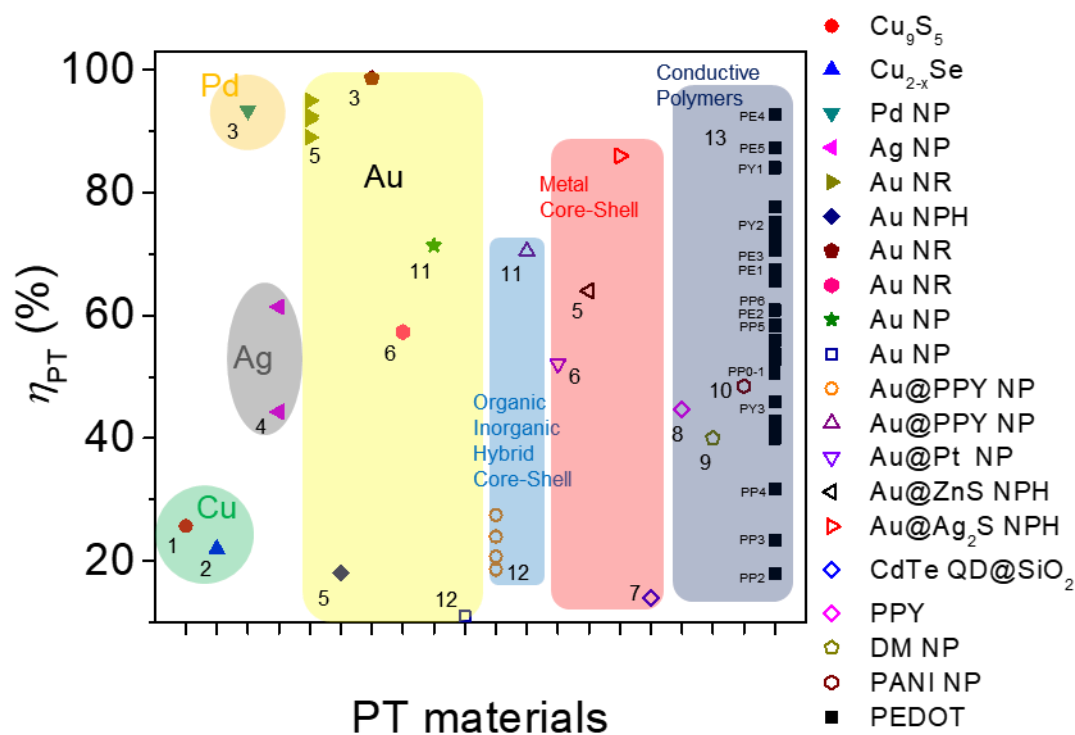

Figure S1. Photothermal conversion efficiency of various photothermal materials including metals, conductive polymers, and organic-inorganic hybrid materials. NP: nanoparticle, NR: nanorod, NPH: nanopolyhedron, PPY: polypyrrole, QD: quantum dot, DM: dopamine melanin, PANI: polyaniline. The number near the data point is the reference number of the sample.<sup>[1-13]</sup>

## References

- [1] Q. Tian, F. Jiang, R. Zou, Q. Liu, Z. Chen, M. Zhu, S. Yang, J. Wang, J. Wang, J. Hu, *ACS Nano* **2011**, 5, 9761.
- [2] C. M. Hessel, V. P. Pattani, M. Rasch, M. G. Panthani, B. Koo, J. W. Tunnell, B. A. Korgel, *Nano Lett.* **2011**, 11, 2560.



- [3] J.-W. Xiao, S.-X. Fan, F. Wang, L.-D. Sun, X.-Y. Zheng, C.-H. Yan, *Nanoscale* **2014**, 6, 4345.
- [4] D. Wen, H. Zhang, H.-J. Chen, G. Lin, *4th Micro and Nano Flows Conference* **2014**, 1.
- [5] H. Chen, L. Shao, T. Ming, Z. Sun, C. Zhao, B. Yang, J. Wang, *Small* **2010**, 6, 2272.
- [6] J. Tang, X. Jiang, L. Wang, H. Zhang, Z. Hu, Y. Liu, X. Wu, C. Chen, *Nanoscale* **2014**, 6, 3670.
- [7] M. Chu, X. Pan, D. Zhang, Q. Wu, J. Peng, W. Hai, *Biomaterials* **2012**, 33, 7071.
- [8] M. Chen, X. Fang, S. Tang, N. Zheng, *Chem. Commun.* **2012**, 48, 8934.
- [9] Y. Liu, K. Ai, J. Liu, M. Deng, Y. He, L. Lu, *Adv. Mater.* **2013**, 25, 1353.
- [10] J. Zhou, Z. Lu, X. Zhu, X. Wang, Y. Liao, Z. Ma, F. Li, *Biomaterials* **2013**, 34, 9584.
- [11] M. Lin, C. Guo, J. Li, D. Zhou, K. Liu, X. Zhang, T. Xu, H. Zhang, L. Wang, B. Yang, *ACS Appl. Mater. Interfaces* **2014**, 6, 5860.
- [12] J. Li, J. Han, T. Xu, C. Guo, X. Bu, H. Zhang, L. Wang, H. Sun, B. Yang, *Langmuir* **2013**, 29, 7102.
- [13] B. Kim, M. Han, E. Kim, *J. Mater. Chem. A* **2019**, 7, 2066.
